# Supplementary material for: ImmuCellAI: A Unique Method for Comprehensive T‐Cell Subsets Abundance Prediction and its Application in Cancer Immunotherapy
Source: PubMed Central journal article supplement (PMC7141005; doi:10.1002/advs.201902880), 2020-02-11
Supplement: ADVS-7-1902880-s001.pdf [file ADVS-7-1902880-s001.pdf]

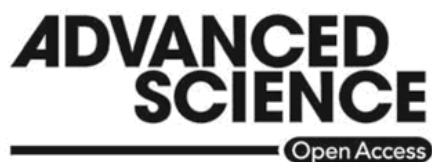

## Supporting Information

for *Adv. Sci.*, DOI: 10.1002/advs.201902880

**ImmuCellAI: A Unique Method for Comprehensive T-Cell  
Subsets Abundance Prediction and its Application  
in Cancer Immunotherapy**

*Ya-Ru Miao, Qiong Zhang, Qian Lei, Mei Luo, Gui-Yan Xie,  
Hongxiang Wang, and An-Yuan Guo\**

## Supporting Information

**Figure S1** Direct comparison (Pearson correlation analysis) between cell fractions predicted by ImmuCellAI and the real cell abundance listed in Fig. 2b on PBMCs of samples from healthy individuals (a) and patients with AML (b).

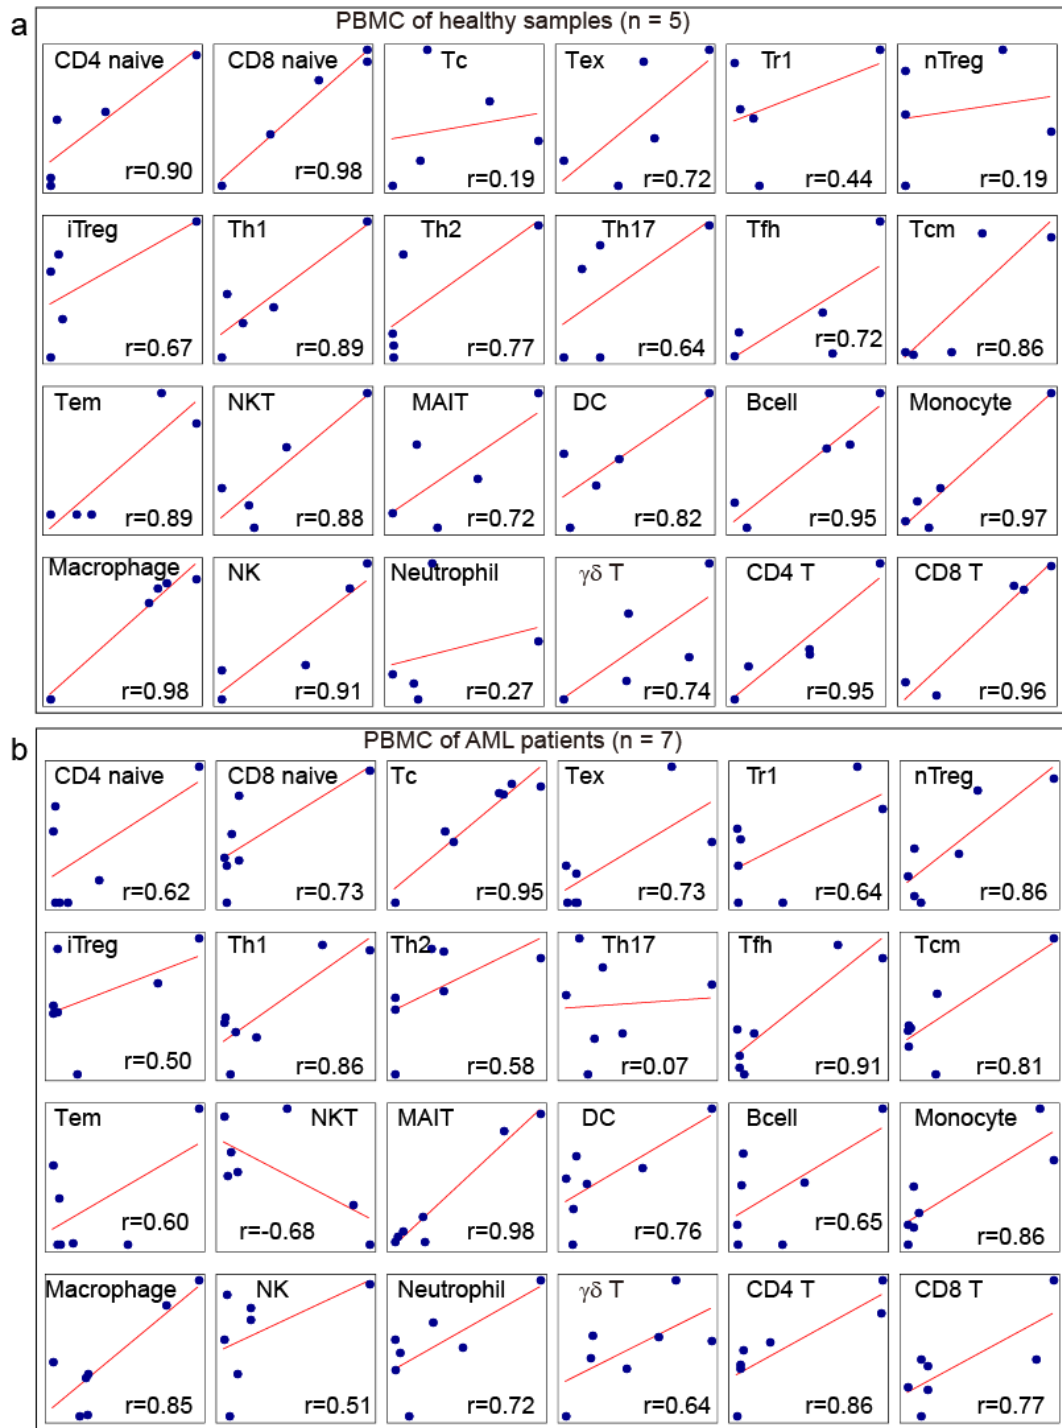

**Figure S2** Direct comparison between cell fractions predicted by ImmuCellAI and the real cell abundance listed in Fig. 2c and 2d in public datasets estimated by RNA-Seq

(a) and microarray (b).

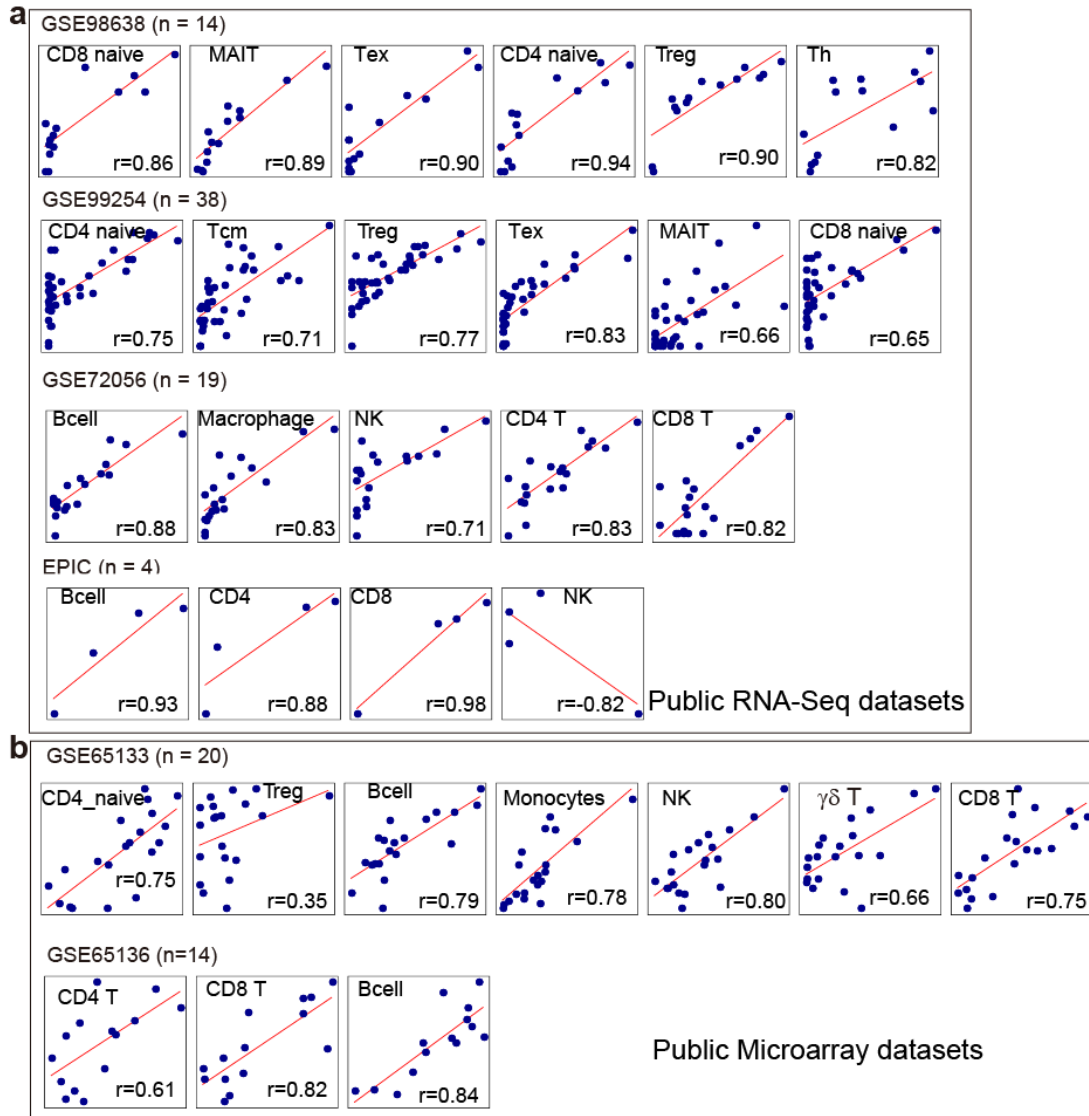

**Figure S3** Partial correlation analysis of the infiltration of immune cells between the nidus and adjacent tissues, taking age and gender into consideration

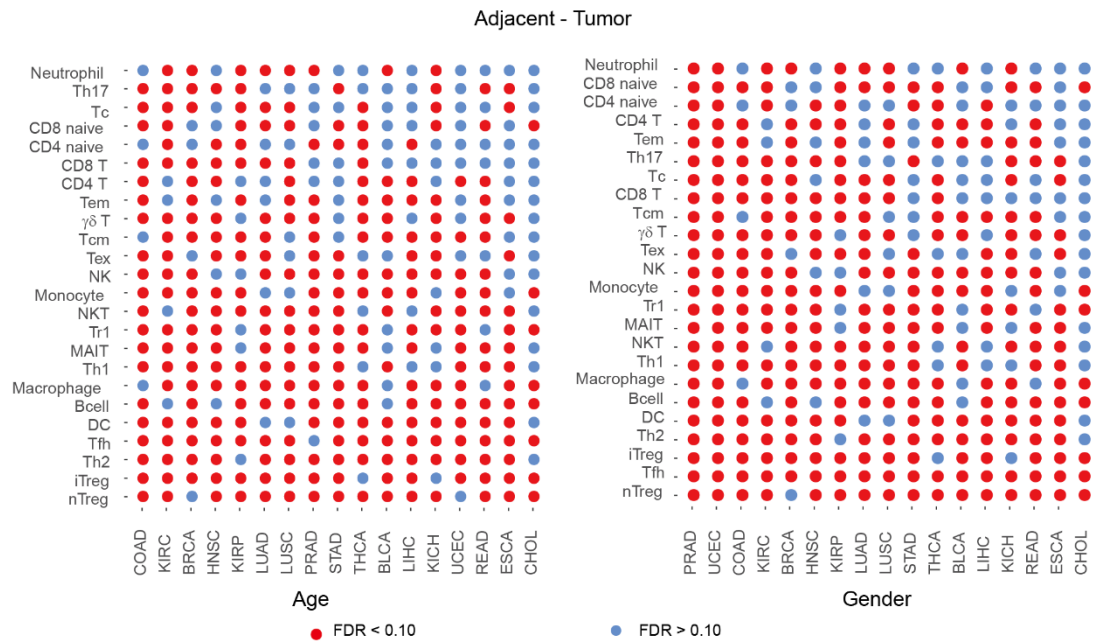

**Figure S4** Kaplan–Meier curves of melanoma (SKCM) by the infiltration of 12 immune cell types including Tfh,  $\gamma\delta$  T, Tc, Neutrophil, Th1, NKT, CD8 T, Th2, CD8 naïve, NK, Th17, and iTreg.

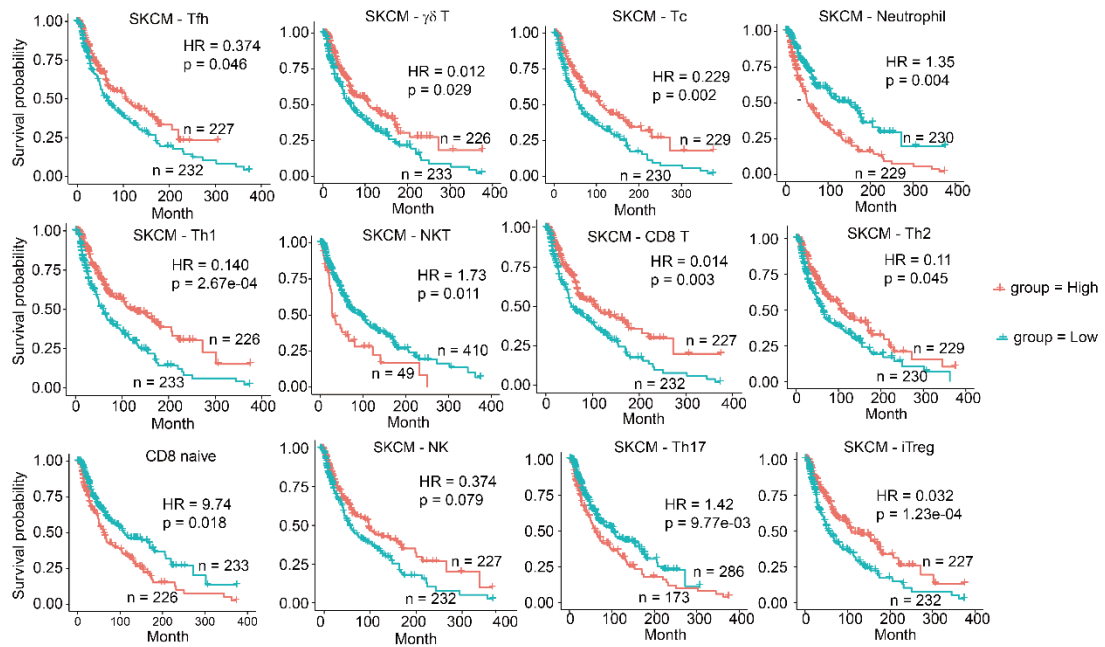

**Figure S5** Partial correlation analysis of the infiltration of immune cells and clinical factors (age and gender)

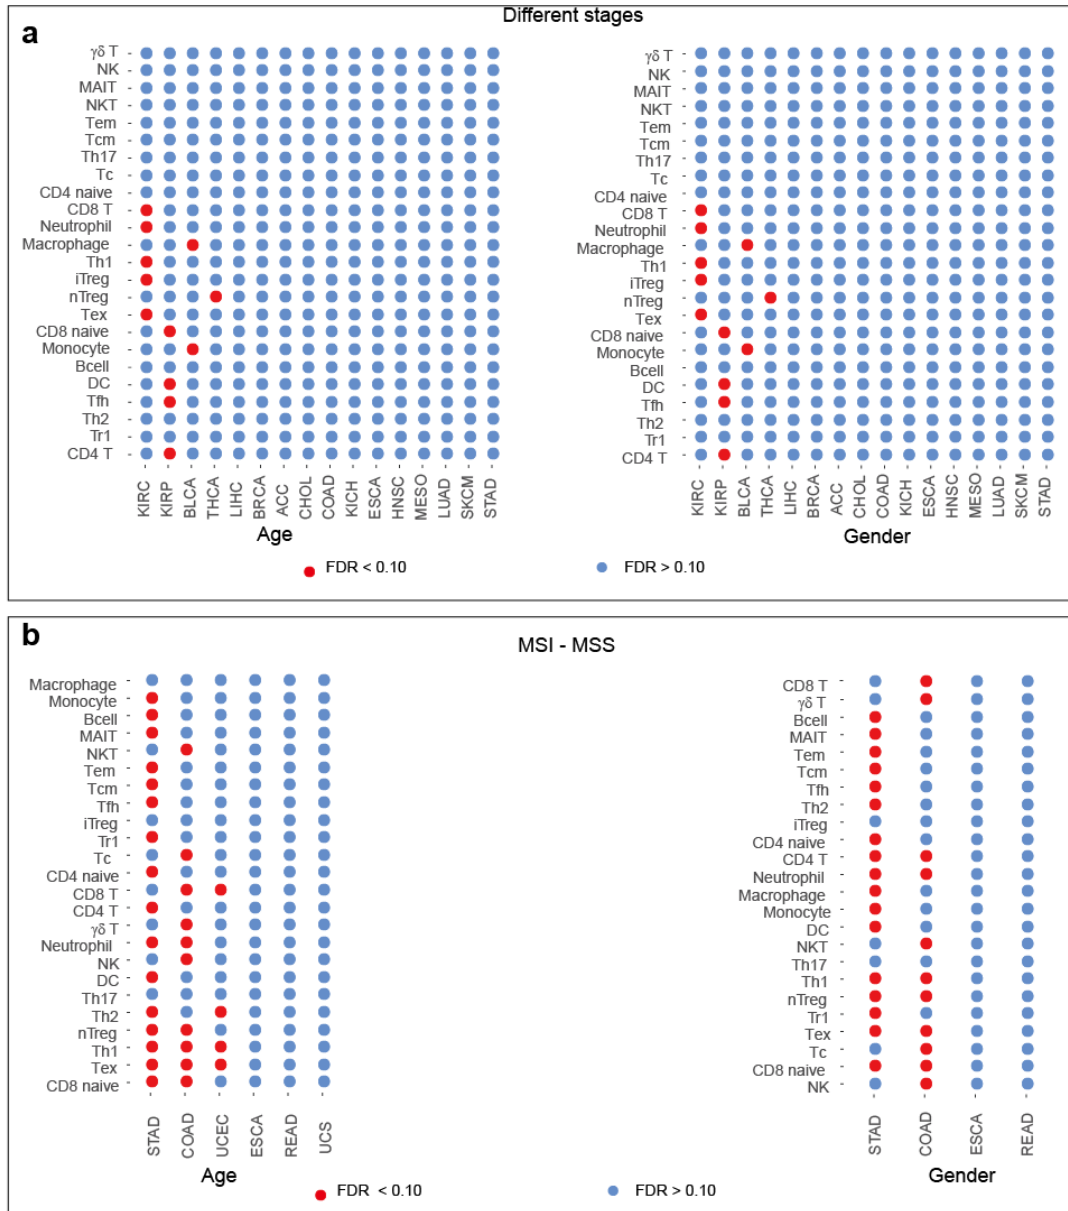

**Figure S6** Association of the infiltration of antitumor (a) and tumor suppressor (b) immune cells with microsatellite instability (MSI) status in COAD and STAD.

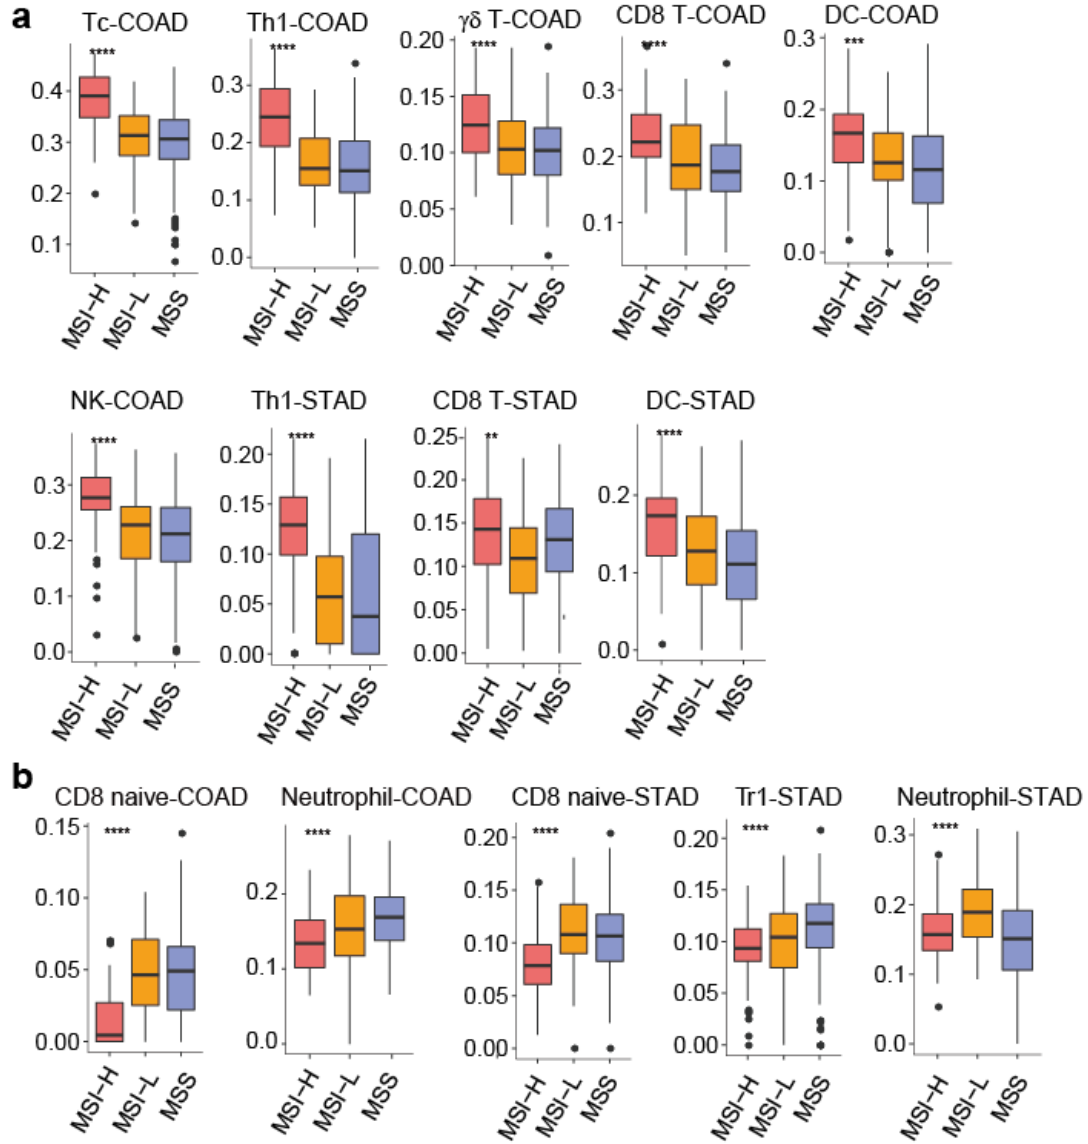

**Figure S7** The abundance of tumor-infiltrating Tex, Th1, iTreg, and CD8<sup>+</sup> T cells elevated with the clinical stage in KIRC

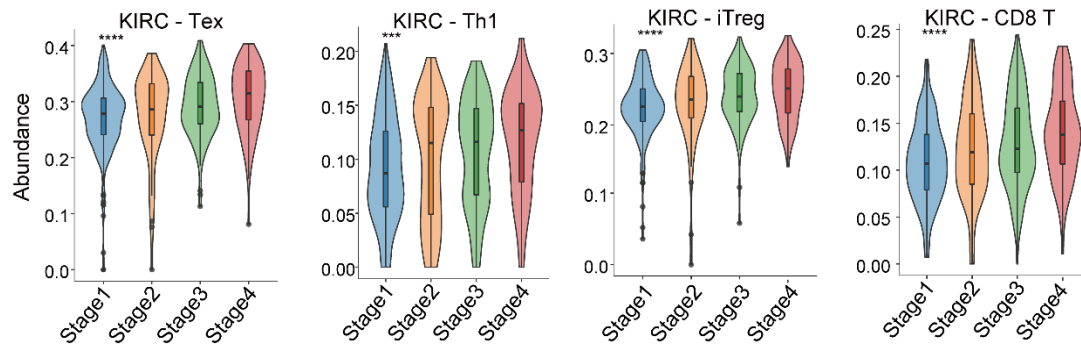



**Table S1** All marker genes used in ImmuCellAI

**Table S2** A list of immune cell reference expression profiles collected from the GEO database

**Table S3** Characteristics of the patients and healthy donors

| Sample ID | Gender | Age | Sample source | Trait   |
|-----------|--------|-----|---------------|---------|
| L1        | Female | 55  | PBMC          | AML     |
| L2        | Female | 53  | PBMC          | AML     |
| L3        | Female | 77  | PBMC          | AML     |
| L4        | Male   | 47  | PBMC          | AML     |
| L5        | Female | 59  | PBMC          | AML     |
| L6        | Male   | 68  | PBMC          | AML     |
| L7        | Male   | 70  | PBMC          | AML     |
| A         | Female | 30  | PBMC          | Healthy |
| B         | Male   | 25  | PBMC          | Healthy |
| C         | Male   | 28  | PBMC          | Healthy |
| D         | Male   | 27  | PBMC          | Healthy |
| E         | Female | 45  | PBMC          | Healthy |

**Table S4** Immune cell antibodies used in flow cytometry

| Cell type | Antibody      |
|-----------|---------------|
| Bcell     | CD45+CD19+    |
| DC        | CD11c+HLA-DR+ |

|                                   |                             |
|-----------------------------------|-----------------------------|
| Macrophage                        | CD45+CD11b+                 |
| Monocyte                          | CD45+CD14+                  |
| Neutrophil                        | CD66b+CD11c+                |
| NK                                | CD45+CD56+CD3-              |
| NKT                               | CD45+CD3+CD56+              |
| CD4 naïve                         | CD3+CD4+CD45RA+CCR7+        |
| CD4 T                             | CD3+CD4+                    |
| iTreg                             | CD4+CD25+FOXP3+Helios-      |
| nTreg                             | CD4+CD25+FOXP3+ Helios+     |
| Tfh                               | CD4+CD25-CXCR5+PD-1+        |
| Th1                               | CD45+CD4+IFN- $\gamma$      |
| Th17                              | CD45+CD4+IL-17a             |
| Th2                               | CD45+CD4+IL-4               |
| Tr1                               | CD4+CD25-LAG3+              |
| CD8 naïve                         | CD3+ CD8+CD45RA+ CCR7+      |
| CD8 T                             | CD3+CD8+                    |
| Exhausted                         | CD45+CD3+CD8+PD-1+          |
| Cytotoxic                         | CD3+CD8+CD57+TCRV $\beta$ + |
| Central memory                    | CD45+CD3+CD45RO+CCR7+       |
| Effector memory                   | CD45+CD3+CD45RO+CCR7-       |
| Gamma delta T ( $\gamma\delta$ T) | CD3+TCRV $\delta$ 2+        |

MAIT

CD3+ CD161++ Va7.2 TCR+

**Table S5** Antibody and its corresponding clone id used in flow cytometry

| <b>Antibody</b>                 | <b>Clone id</b>   |
|---------------------------------|-------------------|
| anti-CD45-APC-H7                | clone 2D1         |
| anti-CD4-BB515                  | clone RPA-T4      |
| anti-CD8-PE                     | clone RPA-T8      |
| anti-CD3-PerCPCy5.5             | clone SP34-2      |
| anti-CD25-PECy7                 | clone M-A251      |
| anti-CD279-APC                  | clone MIH4        |
| anti-CCR7-Alexa Fluor 647       | clone 3D12        |
| anti-IL-4-PE                    | clone 8D4-8       |
| anti-IFN- $\gamma$ - PercpCy5.5 | clone 4S.B3       |
| anti-IL-17-Alexa Fluor 647      | clone<br>SCPL1362 |
| anti-Helios-Alexa Fluor 647     | clone 22F6        |
| anti-FoxP3-BB700                | clone<br>236A/E7  |
| anti-LAG-3-PE                   | clone T47-530     |
| anti-CXCR5-BB700                | clone RF8B2       |
| anti-CD56-PECy7                 | clone B159        |

|                          |              |
|--------------------------|--------------|
| anti-CD19-APC            | clone HIB19  |
| anti-HLA-DR-PECy7        | clone G46-6  |
| anti-CD11c-PE            | clone B-ly6  |
| anti-CD66b-PerCPCy5.5    | clone G10F5  |
| anti-CD11b-APC           | clone M1/70  |
| anti-CD14-FITC           | clone M5E2   |
| anti-CD45RA- PECy7       | clone HI100  |
| anti-CD45RO- PECy7       | clone UCHL1  |
| anti-CD57-FITC           | clone NK-1   |
| anti-TCR-V $\beta$ 2-PE  | clone REA654 |
| anti-V $\delta$ 2 TCR-PE | clone B6     |
| anti-CD161-FITC          | clone DX12   |
| anti- TCR-Va7.2-APC      | clone REA179 |

---

**Table S6** Proportion of immune cells measured by flow cytometry for the PBMC of AML and healthy donors

**Table S7** The real immune cell fraction calculated from single-cell barcode of GSE98638

| sample | CD8 naive | MAIT  | Exhausted | CD4 naive | Treg  | Th    |
|--------|-----------|-------|-----------|-----------|-------|-------|
| p0205p | 0.121     | 0.071 | 0.000     | 0.558     | 0.080 | 0.027 |
| p0205t | 0.009     | 0.037 | 0.092     | 0.005     | 0.436 | 0.179 |

|        |       |       |       |       |       |       |
|--------|-------|-------|-------|-------|-------|-------|
| p0322n | 0.005 | 0.405 | 0.000 | 0.074 | 0.005 | 0.279 |
| p0322p | 0.088 | 0.137 | 0.003 | 0.245 | 0.232 | 0.046 |
| p0322t | 0.010 | 0.138 | 0.121 | 0.036 | 0.363 | 0.183 |
| p0407n | 0.013 | 0.100 | 0.017 | 0.071 | 0.088 | 0.363 |
| p0407p | 0.107 | 0.036 | 0.008 | 0.433 | 0.119 | 0.024 |
| p0407t | 0.000 | 0.040 | 0.048 | 0.082 | 0.072 | 0.401 |
| p0508n | 0.005 | 0.283 | 0.000 | 0.052 | 0.009 | 0.344 |
| p0508p | 0.156 | 0.051 | 0.000 | 0.452 | 0.126 | 0.037 |
| p0508t | 0.004 | 0.006 | 0.203 | 0.052 | 0.376 | 0.102 |
| p1116n | 0.000 | 0.100 | 0.000 | 0.021 | 0.170 | 0.390 |
| p1116p | 0.048 | 0.024 | 0.000 | 0.335 | 0.287 | 0.004 |
| p1116t | 0.003 | 0.020 | 0.187 | 0.003 | 0.313 | 0.093 |

---

**Table S8** The real immune cell fraction calculated from single-cell barcode of GSE99254

| Sample   | CD4 naive | Tcm   | Treg  | Exhausted | MAIT  | CD8 naive |
|----------|-----------|-------|-------|-----------|-------|-----------|
| P0616A_P | 0.158     | 0.055 | 0.060 | 0.000     | 0.004 | 0.070     |
| P0616A_T | 0.004     | 0.015 | 0.126 | 0.004     | 0.024 | 0.007     |
| P0616P_P | 0.154     | 0.101 | 0.000 | 0.000     | 0.016 | 0.202     |
| P0616P_T | 0.000     | 0.000 | 0.017 | 0.111     | 0.000 | 0.017     |
| P0617_N  | 0.003     | 0.091 | 0.023 | 0.000     | 0.000 | 0.003     |
| P0617_P  | 0.063     | 0.194 | 0.063 | 0.004     | 0.004 | 0.026     |

|         |       |       |       |       |       |       |
|---------|-------|-------|-------|-------|-------|-------|
| P0617_T | 0.000 | 0.015 | 0.031 | 0.037 | 0.031 | 0.002 |
| P0619_N | 0.011 | 0.018 | 0.060 | 0.021 | 0.000 | 0.000 |
| P0619_P | 0.101 | 0.105 | 0.072 | 0.000 | 0.018 | 0.080 |
| P0619_T | 0.003 | 0.003 | 0.145 | 0.222 | 0.003 | 0.000 |
| P0706_P | 0.010 | 0.058 | 0.010 | 0.000 | 0.000 | 0.019 |
| P0706_T | 0.028 | 0.051 | 0.252 | 0.126 | 0.008 | 0.002 |
| P0729_N | 0.003 | 0.000 | 0.016 | 0.006 | 0.003 | 0.013 |
| P0729_P | 0.020 | 0.081 | 0.054 | 0.000 | 0.000 | 0.071 |
| P0729_T | 0.000 | 0.004 | 0.033 | 0.050 | 0.017 | 0.012 |
| P0913_N | 0.049 | 0.038 | 0.000 | 0.011 | 0.000 | 0.011 |
| P0913_P | 0.084 | 0.158 | 0.134 | 0.000 | 0.000 | 0.039 |
| P0913_T | 0.029 | 0.006 | 0.243 | 0.049 | 0.006 | 0.004 |
| P1010_N | 0.005 | 0.028 | 0.133 | 0.000 | 0.000 | 0.005 |
| P1010_P | 0.049 | 0.171 | 0.046 | 0.000 | 0.000 | 0.003 |
| P1010_T | 0.000 | 0.008 | 0.299 | 0.053 | 0.002 | 0.000 |
| P1011_N | 0.000 | 0.000 | 0.000 | 0.231 | 0.000 | 0.000 |
| P1011_P | 0.202 | 0.154 | 0.123 | 0.003 | 0.003 | 0.084 |
| P1011_T | 0.000 | 0.004 | 0.169 | 0.127 | 0.002 | 0.000 |
| P1118_N | 0.005 | 0.047 | 0.026 | 0.005 | 0.000 | 0.000 |
| P1118_P | 0.133 | 0.254 | 0.023 | 0.000 | 0.000 | 0.152 |
| P1118_T | 0.007 | 0.028 | 0.113 | 0.035 | 0.007 | 0.000 |
| P1120_N | 0.000 | 0.000 | 0.000 | 0.073 | 0.049 | 0.000 |

|         |       |       |       |       |       |       |
|---------|-------|-------|-------|-------|-------|-------|
| P1120_P | 0.124 | 0.084 | 0.084 | 0.000 | 0.026 | 0.061 |
| P1120_T | 0.001 | 0.006 | 0.201 | 0.128 | 0.011 | 0.001 |
| P1202_N | 0.004 | 0.015 | 0.045 | 0.015 | 0.023 | 0.004 |
| P1202_P | 0.121 | 0.088 | 0.058 | 0.000 | 0.006 | 0.000 |
| P1202_T | 0.007 | 0.024 | 0.164 | 0.073 | 0.004 | 0.011 |
| P1208_P | 0.164 | 0.085 | 0.141 | 0.000 | 0.009 | 0.141 |
| P1208_T | 0.005 | 0.014 | 0.153 | 0.032 | 0.014 | 0.000 |
| P1219_N | 0.070 | 0.000 | 0.000 | 0.000 | 0.009 | 0.000 |
| P1219_P | 0.131 | 0.049 | 0.087 | 0.000 | 0.038 | 0.038 |
| P1219_T | 0.000 | 0.000 | 0.055 | 0.008 | 0.016 | 0.000 |

**Table S9** The real immune cell fraction calculated from single-cell barcode of GSE72056

| <b>Sample</b> | <b>Bcell</b> | <b>Macrophage</b> | <b>Endothelial</b> | <b>NK</b> | <b>CD4 T</b> | <b>CD8 T</b> |
|---------------|--------------|-------------------|--------------------|-----------|--------------|--------------|
| Patient53     | 0.050        | 0.066             | 0.066              | 0.061     | 0.189        | 0.112        |
| Patient58     | 0.024        | 0.012             | 0.000              | 0.024     | 0.116        | 0.387        |
| Patient59     | 0.018        | 0.009             | 0.000              | 0.000     | 0.000        | 0.000        |
| Patient60     | 0.372        | 0.019             | 0.000              | 0.041     | 0.130        | 0.126        |
| Patient65     | 0.052        | 0.021             | 0.000              | 0.000     | 0.096        | 0.344        |
| Patient67     | 0.159        | 0.000             | 0.008              | 0.008     | 0.218        | 0.194        |
| Patient71     | 0.023        | 0.015             | 0.000              | 0.000     | 0.036        | 0.145        |
| Patient72     | 0.168        | 0.000             | 0.005              | 0.005     | 0.291        | 0.103        |

|           |       |       |       |       |       |       |
|-----------|-------|-------|-------|-------|-------|-------|
| Patient74 | 0.079 | 0.028 | 0.000 | 0.006 | 0.041 | 0.415 |
| Patient75 | 0.013 | 0.010 | 0.003 | 0.000 | 0.029 | 0.554 |
| Patient78 | 0.013 | 0.000 | 0.000 | 0.000 | 0.000 | 0.000 |
| Patient79 | 0.088 | 0.000 | 0.003 | 0.001 | 0.038 | 0.186 |
| Patient80 | 0.101 | 0.002 | 0.057 | 0.010 | 0.179 | 0.103 |
| Patient81 | 0.013 | 0.004 | 0.009 | 0.004 | 0.039 | 0.109 |
| Patient82 | 0.019 | 0.039 | 0.010 | 0.029 | 0.122 | 0.069 |
| Patient84 | 0.145 | 0.140 | 0.005 | 0.038 | 0.123 | 0.117 |
| Patient88 | 0.044 | 0.106 | 0.003 | 0.023 | 0.094 | 0.122 |
| Patient89 | 0.215 | 0.051 | 0.006 | 0.002 | 0.049 | 0.230 |
| Patient94 | 0.171 | 0.007 | 0.057 | 0.002 | 0.164 | 0.078 |

---
